# Supplementary material
Source: HighWire-hosted journal article supplement (https://openres.ersjournals.com/content/9/3/00378-2022)
Supplement: inline-supplementary-material-4 [file inline-supplementary-material-4.pdf]

# Online Supplement

## Supplementary methods

### BAL supernatant processing for LC-MS/MS analysis

BAL supernatants for proteomic analysis were processed using an S-Trap-based method (protifi.com). Samples were visually inspected for hemolysis and specimens that appeared pink were omitted from the study. Pilot analysis determined protein content per volume BAL to be consistent across healthy and COPD donors. Fifty microliters of BAL from healthy donors (including never-smokers and ex-smokers) and COPD subjects were treated with S-trap buffer (5% sodium dodecyl sulfate, 50 mM triethylammonium bicarbonate (TEABC) buffer, 0.76% phosphoric acid, pH 7.55) and sonicated for 15 min to completely denature proteins. Subsequently samples were reduced in 10 mM tris(2-carboxyethyl)phosphine hydrochloride (TCEP, Sigma), pH 7.8 for 30 min at 65°C followed by alkylation using 40 mM iodoacetamide (IAA, Sigma) in the dark for 30 min at room temperature. Proteins were digested using sequence grade trypsin/lysC (Promega, Madison, WI) at a 15:1 ratio at 37°C for 12 hrs on micro S-Trap cartridges. The resulting peptides were resuspended in 0.1% trifluoroacetic acid (TFA, Sigma), desalted using Oasis HLB 96-well plate (2 mg sorbent, 30µm, Waters) and used for tandem mass tag (TMT) (cat. No. A34808, Thermo Fisher Scientific) labelling according to manufacturer's instructions. Digested peptides derived from 25µl equivalent of 110 BAL supernatants from healthy and COPD donors, were randomized across 11 batches and labelled with 145 µg of 11-plex TMT reagents. Each TMT set contained a similar distribution of healthy non-smoker, ex-smoker and COPD samples and TMT 131C was dedicated to a pooled sample comprised of all study specimens. 11plex-TMT labelled samples were then combined, concentrated in a SpeedVac and fractionated on an Oasis plate (Waters # 186001828BA) under basic conditions. Initially 12 different elutions were collected by using a step gradient of acetonitrile containing 10mM TEABC. Distant fractions were then pooled to generate 3 final samples from each TMT batch for mass spectrometry analysis.

## Nanoflow LC-MS/MS analysis

LC-MS/MS analysis of TMT labelled peptides was carried out on a Q Exactive HF-X (Thermo Fisher Scientific) mass spectrometer interfaced with a Dionex 3000 RSLCnano system. Peptides were captured on a 2 cm x 75  $\mu$ m C18 trap column (ReproSil-Pur 120 C18-AQ 7 $\mu$ m) and samples were separated on a monolithic column (50 cm, cut from a 2 m long column, 100  $\mu$ m ID, GL Sciences Inc. USA) using a gradient of solvent A (0.2% formic acid) and solvent B (0.2% formic acid in 90% acetonitrile). Peptides were separated using a 90 min gradient of solvent B as follows: 4% to 16.5%B in 2.5 - 52.5 min; 33.5% B in 73 min followed by a stay at 98% B for 3 min and re-equilibration at 2% B. A flowrate of 0.7  $\mu$ L/min was used. Peptides were sprayed in an electrospray ionization (ESI) source using a stainless steel emitter with 2kV at a capillary temperature of 275°C. A full-scan MS spectrum was collected at 60,000 resolution at m/z of 200 and scanned at 350-1200 m/z with automatic gain control (AGC) of 3E6. The top 12 precursors were selected, and an MS/MS scan was obtained at 7,500 resolution with 50 ms injection time, isolation window of 0.9 m/z with offset 0.1 m/z, normalized collision energy (NCE) of 29. For MS2, minimum AGC target was set to 1.7E4. Dynamic exclusion duration was set to 15 sec. The fixed first mass was set to 100 m/z. Charge state exclusion was set to ignore unassigned, 1, and 7 and greater charges. For internal mass calibration, lock mass of 371.10124 m/z was used.

## Data analysis

Mass spectrometry data was analysed using Proteome Discoverer 2.3 (Thermo Fisher Scientific) software with search engine Mascot (version 2.6.0). Data was searched using latest UniProt Human protein database. Unfragmented precursor and TMT reporter ions were removed using a non-fragment filter in the PD 2.3 workflow. Search parameters included 3 missed cleavages for trypsin, oxidation (M) and deamidation (N, Q) as variable modifications. Tandem label (229.163Da) at N-terminus and lysine residues and carbamidomethylation on cysteine residues were set as fixed modifications. The mass tolerances on precursor and fragment masses were set at 20 ppm and 0.05 Da, respectively for MS2 analysis. Consensus step in PD2.3 included several nodes for spectrum, peptide and protein grouping and FDR calculation. Reporter ions for TMT labelled peptides were quantified using the PD quantitation node and peak integration tolerance was set at 20 ppm by considering most

confident centroid peaks. Signal to noise values were calculated in addition to measurement of intensities of the TMT reporter ion for peptide and protein quantitation. The intensities were normalized by total peptide amount in PD 2.3. To account for protein input, the global quantitative proteome data was reviewed before normalization and no samples showed an unexpected pattern of distribution. Albumin and hemoglobin abundances were not significantly different between sub-cohorts. Further normalization of the data across all samples was carried out using Reporter Ion Quantitation in Proteome Discoverer, which calculates the total sum of the abundance values for each TMT channel over all peptides identified within a file. The channel with the highest total abundances serves as a reference for correcting abundances across the remaining channels by a constant factor.

### **Macrophage expression analysis**

The RNA-sequencing was conducted as a total RNA-seq using the Kapa RNA HyperPrep Kit with RiboErase, and a paired-end sequencing approach (2 x 51) on an Illumina NovaSeq 6000 platform. Fastq files were processed, quality checked and estimated read counts as well as variance-stabilized transformed data generated. All as been previously been described (1). The average read depth per macrophage sample were 55.9 million. Statistical analysis of the transcriptomic data set was explored using differential expression testing and Weighted Gene Correlation Network analysis (WGCNA) (2). Differential expression testing was performed using DESeq2 (v1.26.0) using apeglm (3) for fold change shrinkage, all in R (v3.6.1). Estimated counts was used as input for DESeq2 with lowly expressed genes excluded (required at least 10 counts in at least 20 samples). In the models used to assess differential expression between subject groups, effects from gender and a technical batch-effect (library batch effect) were taken into account. The Benjamini-Hochberg multiple testing correction method was applied. Weighted Gene Correlation Network Analysis (WGCNA) was also implemented to explore this transcriptomics dataset. WGCNA was performed using the WGCNA R package(2). Variance-stabilized transformed genes expression data were used as input for this analysis. Construction of the gene network was performed using the WGCNA automatic network construction method, which is a 1-step network construction and module detection function. A soft thresholding power of 7 was chosen based on the scale-free topology fit output of the *pickSoftThreshold* function. Parameters used to cluster genes into modules included *minModuleSize* =50, *mergeCutHeight* = 0.25 and *deepSplit* = 2. Module clustering using

module eigengenes was used to identify relationships between modules. Assessment of module association with clinical trait metadata was performed to determine the presence of modules with high trait significance, which may indicate presence of genes or pathways of biological relevance. Gene list enrichment analysis was performed on gene lists extracted from modules or module clusters of interest using ToppFunn, which is part of the online ToppGene Suite using default parameter settings (FDR multiple correction method and enrichment significance cut off level 0.05) (4).

### **Serum processing for LC-MS/MS proteomic analysis**

Serum total protein has minimal inter-individual variability and is highly consistent across donors. The serum proteome has a broad concentration range spanning ~11 orders of magnitude with albumin accounting for more than half the total protein in circulation. In this study, 10  $\mu$ l of serum per donor underwent depletion of the top fourteen most abundant blood proteins using High Select Top14 Abundant Protein Depletion Kit (Thermo Fisher Scientific) according to manufacturer's instructions. Depleted serum was subjected to reduction, alkylation and trypsin/lysC digestion via EasyPep 96 MS Sample Prep Kit (Thermo Fisher Scientific) as outlined by the manufacturer. All serum samples were processed in a single 96-well EasyPep plate eliminating batch effects. Resultant peptides were dried and resuspended in 0.1% formic acid aqueous buffer.

### **Serum proteomic nanoflow LC-MS/MS analysis**

Serum LC-MS/MS analysis was carried out on an Exploris 480 (Thermo Fisher Scientific) mass spectrometer interfaced with a Dionex 3000 RSLCnano system. Peptides, 150 ng per sample, were injected on an Acclaim PepMap RSLC 75  $\mu$ m x15 cm column (Thermo Fisher Scientific) at a flow rate of 350  $\mu$ l/min and separated over a 45 min gradient of solvent A (0.1% formic acid) and solvent B (0.1% formic acid in acetonitrile). Gradient of solvent B as follows: 4% to 24% in 2.5 - 40 min; 36% B at 48 min; 64% B at 48.5 held for 4.5 min; 98% B at 53.5 min held for 1.5 min followed by re-equilibration at 4% B. Peptides were sprayed in an electrospray ionization (ESI) source using a stainless-steel emitter with 1650V at a temperature of 270°C. A full-scan MS spectrum was collected at 120,000 resolution at m/z of 200 and scanned at 350-1200 m/z with automatic gain control (AGC) of 100% corresponding to 1E6. DIA MS/MS scans were obtained at 30,000 resolution with the isolation window set to 21 m/z and an overlap of 1 m/z over a precursor mass range of 350-1200 m/z. AGC target was set to 2000% (100% = 1E5).

### **Serum proteomic data analysis**

Serum DIA analysis was conducted in Spectronaut v15 (Biognosys) using the latest UniProt Human protein database and a spectral library representative of healthy and COPD serum proteomes. Serum DIA raw files were searched against a spectral library generated from data-dependent acquisition (DDA) raw files from five pooled and fractionated serum samples, comprised of ten donors each (five male and five female) merged with DDA serum data from this cohort (non-fractionated). The final spectral library used for this analysis contained 3075 proteins (1417 protein groups) representative of 50 healthy donors (25 male and 25 female) in addition to this entire study cohort. Analysis was performed without imputation, with an FDR=0.01 (Qvalue cut off). All observations that passed the Qvalue threshold at least once were included. A list of protein groups identified in each sample and their corresponding intensities was exported to Perseus for further statistical and graphical analysis.

### **Lipidomics sample preparation**

Lipid extraction from BAL supernatants were performed using a modified Maytash method (5). Frozen BAL aliquots (50  $\mu$ L) were thawed at 4 °C and mixed for 30 seconds at 2000 RPM and 4 °C. 225  $\mu$ L cold (-30 °C) methanol (MeOH) was added to samples on ice and mixed for 1 minute at 2000 RPM. Samples were spiked with 1  $\mu$ L Splash Lipidomix (Avanti Polar Lipids) comprised of 14 deuterated lipid internal standards and mixed for 1 minute at 2000 RPM and 4 °C. 750  $\mu$ L of methyl tert-butyl ether (MTBE) was added and samples were mixed at 2000 RPM for 6 minutes at 4°C. 187.5  $\mu$ L H<sub>2</sub>O was added to induce phase separation and samples were mix at 2000 RPM for 6 minutes at 4°C. Centrifugation was performed for 5 minutes at 14,000  $xg$  and 20 °C. Aliquots of 650  $\mu$ L lipid supernatant were transferred into separate tubes. Samples were dried in a SpeedVac (Thermo Scientific). Dried extracts were stored at -80 °C until reconstitution and subsequent LC-MS and LC-MS/MS analysis.

### **LC-MS and LC-MS/MS lipidomics analysis**

Lipid fractions were reconstituted in 100  $\mu$ L 90:10 MeOH:toluene and mixed for 1 minute at 1500 RPM. Samples were sonicated for 2 minutes in a water bath, mixed for 1 minute at 1500 RPM, and centrifuged for 5 minutes at 16,000  $xg$  and 20°C. 5  $\mu$ L from each sample was combined to serve as pooled quality control (QC) sample. Samples were transferred to glass HPLC vials and analysed by LC-MS and LC-MS/MS. Lipid samples were analysed in both positive and negative mode ionization. Samples were analysed on a Vanquish UHPLC – Orbitrap ID-X Tribrid MS (Thermo Scientific) using a chromatographic method adopted from Fiehn and coworkers (6). Mobile phase A and B were 0.1% formic acid and 10 mM ammonium

formate in 60:40 ACN:H<sub>2</sub>O and 0.1% formic acid and 10 mM ammonium formate in 90:10 IPA:ACN. Chromatographic separation was performed on Acquity UPLC CSH C18 column (1.7  $\mu$ m, 2.1 x 100mm) (Waters Corporation). Column temperature was maintained at 65°C. LC-MS analysis was performed with a scan range of 120-1200 m/z at Orbitrap resolution of 60,000 on each individual sample. Lipid identification was performed by LC-MS/MS using HCD fragmentation with AcquireX DeepScan data-dependent acquisition workflow (ThermoFisher) performed on iterative injections of a pooled lipid extract from this study.

### **Lipidomics data analysis**

Lipidomics LC-MS and LC-MS/MS data were analyzed using MS-DIAL version 4.60 (7). Peak detection, adduct assignment, identification, alignment, and normalization were performed in MS-DIAL. Lipid annotations were performed using LipidBlast *in silico* fragmentation spectral library provided with MS-DIAL version 4.60 with all lipid classes considered. Lipids were annotated from LC-MS/MS data with identification score cutoff of 70% and MS and MS/MS mass tolerances of 0.005 Da and 0.05 Da, respectively. Lipid acyl chain compositions are reported as the sum composition for species in which fragmentation spectra does not meet score threshold to confidently assign individual acyl chain compositions (e.g., PC 30:0). The concentration of each lipid was quantified by normalizing to the abundance of SPLASH Lipidomix (Avanti Polar Lipids) isotopically labelled internal standard spiked into each sample (described above) for each lipid class and expressed in nmol/ml. Percent composition of individual lipid species is determined by the ratio of individual lipid species concentrations to the sum of all species identified from the same lipid class (e.g., PCs).

### **References**

1. Watson A, Öberg L, Angermann B, Spalluto CM, Hühn M, Burke H, et al. Dysregulation of COVID-19 related gene expression in the COPD lung. *Respiratory research*. 2021;22(1):1-13.
2. Langfelder P, Horvath S. WGCNA: an R package for weighted correlation network analysis. *BMC bioinformatics*. 2008;9(1):1-13.
3. Zhu A, Ibrahim JG, Love MI. Heavy-tailed prior distributions for sequence count data: removing the noise and preserving large differences. *Bioinformatics*. 2019;35(12):2084-92.
4. Chen J, Bardes EE, Aronow BJ, Jegga AG. ToppGene Suite for gene list enrichment analysis and candidate gene prioritization. *Nucleic acids research*. 2009;37(suppl\_2):W305-W11.
5. Matyash V, Liebisch G, Kurzchalia TV, Shevchenko A, Schwudke D. Lipid extraction by methyl-tert-butyl ether for high-throughput lipidomics. *J Lipid Res*. 2008;49(5):1137-46.

6. Cajka T, Smilowitz JT, Fiehn O. Validating Quantitative Untargeted Lipidomics Across Nine Liquid Chromatography-High-Resolution Mass Spectrometry Platforms. *Anal Chem.* 2017;89(22):12360-8.
7. Tsugawa H, Ikeda K, Takahashi M, Satoh A, Mori Y, Uchino H, et al. A lipidome atlas in MS-DIAL 4. *Nat Biotechnol.* 2020;38(10):1159-63.

## Supplementary Tables

|                             | Control                      |                              |                              | COPD                         |                                   |
|-----------------------------|------------------------------|------------------------------|------------------------------|------------------------------|-----------------------------------|
|                             | HV-NS                        | HV-ES                        | P-Value<br>(HV-NS vs. HV-ES) |                              | P-Value (HV-ES controls vs. COPD) |
| N of subjects<br>(Total=62) | 19                           | 22                           | -                            | 34                           | -                                 |
| M/F                         | 11/8                         | 12/10                        | 0.8294                       | 26/8                         | 0.0863                            |
| Age                         | 63.0 (12.0)                  | 66.5 (7.3)                   | 0.0989                       | 70.0 (11.5)                  | 0.5679                            |
| Pack-years of smoking       | 0.0 (1.6)                    | 25.0 (18.1)                  | <b>&lt;0.0001</b>            | 40.5 (32.6)                  | 0.1272                            |
| BMI, kg/m <sup>2</sup>      | 28.0 (5.2)                   | 27.7 (4.2)                   | >0.9999                      | 28.3 (6.6)                   | >0.9999                           |
| FEV1%                       | 102.0 (15.5)                 | 100.0 (10.75)                | >0.9999                      | 78.0 (25.0)                  | <b>&lt;0.0001</b>                 |
| FEV1/FVC ratio              | 80.0 (5.0)                   | 87.5 (4.3)                   | 0.5336                       | 55.0 (17.0)*                 | <b>&lt;0.0001</b>                 |
| TLCO%                       | 95.5 (15.5) <sup>&amp;</sup> | 89.0 (12.5) <sup>&amp;</sup> | 0.4520                       | 73.0 (23.8) <sup>&amp;</sup> | <b>0.0285</b>                     |
| HRCT LAA%                   | 5.32 (4.17) <sup>^</sup>     | 5.86 (4.98) <sup>^</sup>     | 0.6348                       | 13.16 (8.74) <sup>^</sup>    | <b>0.0017</b>                     |
| HRCT E/I MLD                | 0.800 (0.048) <sup>^</sup>   | 0.800 (0.060) <sup>^</sup>   | >0.9999                      | 0.875 (0.075) <sup>^</sup>   | <b>0.0018</b>                     |
| N (%) in ICS                | 0 (0)                        | 0 (0)                        | -                            | 14 (44.18) <sup>§</sup>      | <b>0.00237</b>                    |
| N (%) on bronchodilators    | 0 (0)                        | 1 (5.00)                     | <b>8.33-E05</b>              | 20 (70.59) <sup>§</sup>      | <b>1.26-E06</b>                   |

**Table S1. Demographics of cohort included for proteomic analysis of serum**

Data are presented as median and IQR (interquartile range) unless otherwise indicated. Statistical testing performed using Chi-squared test for categorical variables (Sex; Male/Female, ICS use or not and bronchodilator use or not) and Kruskal-Wallis with Dunn's post hoc for continuous variables (all other variables) This table is similar to other research previously reported in the MICAII population<sup>26-29</sup>

<sup>a</sup> Definition of abbreviations: BMI = body mass index; COPD = chronic obstructive pulmonary disease, FEV1 = forced expiratory volume in one second, FVC = forced vital capacity, HV-ES = healthy volunteer never-smoker, HV-NS = healthy volunteer ex-smoker, TLCO% = percent of predicted transfer factor for carbon monoxide, %LAA = High-resolution computed tomography determined emphysema measured by % low attenuation areas (%LAA). ICS = inhaled corticosteroids.



*Notably analysis was undertaken on serum samples from subjects from the final MICAll cohort (table 1), in addition to subjects who were removed from the study prior to bronchoscopy due to numerous reasons, including subject request, not being suitable for bronchoscopy, or not fitting the inclusion criteria as set out in the methodology. Some of these subjects therefore did not undergo \*lung function assessment (1 COPD), %TLCO assessment (3 HV-NS; 1 HV-ES; 11 COPD), ^HRCT scan (3 HV-NS; 2 HV-ES; 8 COPD) or \$inhaled medications were not recorded (1 COPD). These data for these patients are therefore not included within this table.*

**Table S2. Serum proteome summary (table attached at end of document due to size)**

UniProt ID and corresponding gene name for serum proteins identified across all donors in this cohort.

|                             | Control       |               |                              | COPD          |                                      |
|-----------------------------|---------------|---------------|------------------------------|---------------|--------------------------------------|
|                             | HV-NS         | HV-ES         | P-Value<br>(HV-NS vs. HV-ES) |               | P-Value (HV-ES<br>controls vs. COPD) |
| N of subjects<br>(Total=62) | 15            | 18            | -                            | 14            | -                                    |
| M/F                         | 9/6           | 9/9           | 0.5659                       | 11/3          | 0.0977                               |
| Age                         | 64.0 (7.0)    | 67.5 (6.80)   | 0.1457                       | 72.5 (10.5)   | 0.4193                               |
| Pack-years of<br>smoking    | 0.2 (1.8)     | 25.0 (20.9)   | <b>&lt;0.0001</b>            | 45.0 (40.8)   | 0.5947                               |
| BMI, kg/m <sup>2</sup>      | 28.0 (5.2)    | 28.2 (4.0)    | 0.9882                       | 29.3 (5.3)    | >0.9999                              |
| FEV1%                       | 103.0 (17.0)  | 100.5 (8.8)   | 0.8526                       | 79.5 (12.3)   | <b>0.0002</b>                        |
| FEV1/FVC ratio              | 79.0 (4.0)    | 77.0 (4.8)    | 0.3541                       | 61.0 (11.3)   | <b>&lt;0.0001</b>                    |
| TLCO%                       | 95.0 (16.0)   | 88.0 (10.0)   | 0.3331                       | 81.0 (16.0)   | 0.3331                               |
| HRCT LAA%                   | 5.69 (3.99)   | 5.38 (4.32)   | >0.9999                      | 10.8 (8.03)   | <b>0.0362</b>                        |
| HRCT E/I MLD                | 0.800 (0.045) | 0.795 (0.050) | 0.8184                       | 0.840 (0.070) | <b>0.0112</b>                        |
| N (%) in ICS                | 0 (0)         | 0 (0)         | -                            | 7 (50.00)     | <b>0.00237</b>                       |
| N (%) on<br>bronchodilators | 0 (0)         | 1 (5.00)      | <b>8.33-E05</b>              | 12 (85.71)    | <b>1.26-E06</b>                      |

**Table S3. Demographics of cohort included for transcriptomic analysis of purified BAL macrophages**

Data are presented as median and IQR (interquartile range) unless otherwise indicated. Statistical testing performed using Chi-squared test for categorical variables (Sex; Male/Female, ICS use or not and bronchodilator use or not) and Kruskal-Wallis with Dunn's post hoc for continuous variables (all other variables) This table is similar to other research previously reported in the MICAll population<sup>26-29</sup>

<sup>a</sup> Definition of abbreviations: BMI = body mass index; COPD = chronic obstructive pulmonary disease, FEV 1 = forced expiratory volume in one second, FVC = forced vital capacity, HV-ES = healthy volunteer never-smoker, HV-NS = healthy volunteer ex-smoker, TLCO% = percent of predicted transfer factor for carbon monoxide, %LAA = High-resolution computed tomography determined emphysema measured by % low attenuation areas (%LAA). ICS = inhaled corticosteroids.



## Supplementary figure legends

### **Figure S1. Gender differences were not significant across omics datasets.**

**(A)** Lipid distribution between male and female donors was not significantly different. **(B)** Proteome profiles of male and female donors were not significantly different, all had a  $-\log_{10}$  adjusted p-value  $<1.3$ . SFTPA and SFTPB showed minimal differential expression and abundance differences between genders, SFTPA was slightly more abundant in females and SFTPB was slightly more abundant in males.

### **Figure S2. Correlation analysis of SFTPB, SFTPA and SFTPD with NAPSA, CTSH and neutrophil elastase in BAL.**

Spearman's rank correlation of **(A)** SFTPB correlation with napsin A aspartic peptidase (NAPSA), **(B)** SFTPB correlation with Cathepsin H (CTSH), **(C)** SFTPA correlation with neutrophil elastase (ELANE), **(D)** SFTPD correlation with ELANE.

### **Figure S3. Construction of macrophage gene network and detection of modules.**

Construction of dendrogram was performed using an automatic one step network construction and module detection method. **(A)** A soft thresholding power of 7 was chosen based on scale-free topology fit indicating the lowest power which intersected the high value red line ( $R^2 = 0.9$ ) on the scale independence plot, whilst maintaining a mean connectivity score above 0. **(B)** Clustering dendrogram of genes, with dissimilarity based on topological overlap and colours below indicating module assignment. Performed using the WGCNA package in R and the additional parameters: *minModuleSize* =50, *mergeCutHeight* = 0.25 and *deepSplit* = 2.

**Table S2. Serum proteome summary**

| <b>UniProt ID</b>                                                            | <b>Genes</b>                                  |
|------------------------------------------------------------------------------|-----------------------------------------------|
| AOA024R6I7                                                                   | SERPINA1                                      |
| AOA075B6I9; P04211                                                           | IGLV7-46;IGLV7-43                             |
| AOA075B6K0; P01717; P01718                                                   | IGLV3-16;IGLV3-25;IGLV3-27                    |
| AOA075B7C5; A0A494C1Q1; P13501                                               | CCL5                                          |
| AOA087WTK0; A0A087WVC6; Q12913; Q12913-2                                     | PTPRJ                                         |
| AOA087WTY6; A3KFI1; A3KFI2; A3KFI3; A3KFI4; A3KFI5; E5RFZ1; P41271; P41271-2 | NBL1                                          |
| AOA087WV50; A0A087WYT4; A0A0B4J215; C9J2P9; H3BTT7; J3KNA0; S4R3N7           | SENP3;STK4;NIN;CBL L1;HERPUD1;OXA1L; C10orf90 |
| AOA087WWU8; P06753-2; P06753-3; P06753-6                                     | TPM3                                          |
| AOA087WX77; P13591                                                           | NCAM1                                         |
| AOA087WY68; A0A087WZR0; H0Y3Q0; P29122; P29122-2; P29122-7; P29122-8         | PCSK6                                         |
| AOA087WYI3; P41439                                                           | FOLR3                                         |
| AOA087WYS1                                                                   | UGP2                                          |
| AOA087WZM2; D6REQ6; D6RHI9; H0YAE9; O00584                                   | RNASET2;RNASET2;RNASET2;;RNASET2              |
| AOA087WZR4; A0A3B3ISU3; H0Y4U3; M9MML6; O75015                               | FCGR3B                                        |
| AOA087X054; A0A494C039; Q9Y4L1                                               | HYOU1                                         |

|                                                                                                  |                    |
|--------------------------------------------------------------------------------------------------|--------------------|
| A0A087X0D5; P09668                                                                               | CTSH               |
| A0A087X0M8                                                                                       | CHL1               |
| A0A087X0Q4                                                                                       | IGKV2-40           |
| A0A087X0S5; P12109                                                                               | COL6A1             |
| A0A087X0T8; A0A087X1W8; A0A0A0MTJ8;<br>Q9BY67; Q9BY67-2; Q9BY67-3; Q9BY67-4;<br>Q9BY67-5; X5DQS5 | CADM1              |
| A0A087X1J7; P22352                                                                               | GPX3               |
| A0A096LPE2                                                                                       | SAA2-SAA4          |
| A0A0A0MRJ7; P12259                                                                               | F5                 |
| A0A0A0MRN7; Q6YP21; Q6YP21-2                                                                     | KYAT3              |
| A0A0A0MRZ8; P04433                                                                               | IGKV3D-11;IGKV3-11 |
| A0A0A0MS08; P01857                                                                               | IGHG1              |
| A0A0A0MS09; P01880; P01880-2                                                                     | IGHD               |
| A0A0A0MS15                                                                                       | IGHV3-49           |
| A0A0A0MT69                                                                                       | IGKJ4              |
| A0A0A0MTH3; Q13418; Q13418-2; Q13418-3                                                           | ILK                |
| A0A0B4J1R4; P32754; P32754-2                                                                     | HPD                |
| A0A0B4J1R6; P29401; P29401-2                                                                     | TKT                |
| A0A0B4J1U7                                                                                       | IGHV6-1            |
| A0A0B4J1X5                                                                                       | IGHV3-74           |
| A0A0B4J231; B9A064                                                                               | IGLL5              |
| A0A0C4DFP6; Q9NQ79; Q9NQ79-2                                                                     | CRTAC1             |
| A0A0C4DG49; P15151; P15151-2; P15151-3;<br>P15151-4                                              | PVR                |

|                                                                                                                   |                                                                               |
|-------------------------------------------------------------------------------------------------------------------|-------------------------------------------------------------------------------|
| A0A0C4DH25                                                                                                        | IGKV3D-20                                                                     |
| A0A0C4DH34                                                                                                        | IGHV4-28                                                                      |
| A0A0C4DH67                                                                                                        | IGKV1-8                                                                       |
| A0A0D9SEN1; Q12884                                                                                                | FAP                                                                           |
| A0A0G2JMB2                                                                                                        | IGHA2                                                                         |
| A0A0G2JMC9; A0A0G2JMW8; A8MZH0;<br>Q8N149; Q8N149-2; Q8N149-3; Q8N149-4                                           | LILRA2                                                                        |
| A0A0G2JMW3; A0A0G2JP44; Q9HBB8; Q9HBB8-<br>2; Q9HBB8-4                                                            | CDHR5                                                                         |
| A0A0G2JMY9; Q8N6C8; Q8N6C8-3                                                                                      | LILRA3                                                                        |
| A0A0J9YX35                                                                                                        | IGHV3-64D                                                                     |
| A0A0J9YXX1                                                                                                        | IGHV5-10-1                                                                    |
| A0A0J9YY99                                                                                                        |                                                                               |
| A0A0M3HER1; P48059; P48059-2; P48059-3;<br>P48059-4; P48059-5; Q7Z4I7; Q7Z4I7-2; Q7Z4I7-<br>3; Q7Z4I7-4; Q7Z4I7-5 | LIMS1;LIMS1;LIMS1;<br>LIMS1;LIMS1;LIMS1;<br>LIMS2;LIMS2;LIMS2;<br>LIMS2;LIMS2 |
| A0A0S2Z4L3; A0A3B3ISJ1; P07225                                                                                    | PROS1                                                                         |
| A0A0U1RQQ4; Q9UNN8                                                                                                | PROCR                                                                         |
| A0A140T8Y3; A0A140T902; A0A140TA33;<br>A0A140TA52; A0A3B3ISX9; P22105; P22105-1;<br>P22105-4                      | TNXB                                                                          |
| A0A140TA49                                                                                                        | C4A                                                                           |
| A0A1B0GV23; A0A1B0GVD5; A0A1B0GWE8;<br>P07339                                                                     | CTSD                                                                          |

|                                                       |                 |
|-------------------------------------------------------|-----------------|
| AOA286YES1; AOA4W9A917; P01860                        | IGHG3           |
| AOA286YEY4; P01859                                    | IGHG2           |
| AOA286YFJ8; P01861                                    | IGHG4           |
| AOA2Q2TTZ9                                            | IGKV1D-33       |
| AOA2R8Y430; P48637                                    | GSS             |
| AOA2R8Y478; A6NNI4; G8JLH6; P21926                    | CD9             |
| AOA2R8Y524; AOA2R8YEC9; E9PFW2; O00462                | MANBA           |
| AOA2R8YEP4; P30043                                    | BLVRB           |
| AOA2U3TZL5; E9PNW4; P13987; P13987-2                  | CD59;;CD59;CD59 |
| AOA3B3IQ51; P36980; P36980-2                          | CFHR2           |
| AOA3B3IS66                                            | F13B            |
| AOA3B3IS80; P05062                                    | ALDOB           |
| AOA3B3ISD1; C1KBH7; P11362-19; P11362-21;<br>P11362-7 | FGFR1           |
| AOA3B3ISR2; B4DPQ0                                    | C1R             |
| AOA3B3ISS6; Q14956; Q14956-2                          | GPNMB           |
| AOA3B3ISU0; Q02487; Q02487-2                          | DSC2            |
| AOA494C0L6; C9JGI3; P19971; P19971-2                  | TYMP            |
| AOA494C0X7; D3DSM0; P05107                            | ITGB2           |
| AOA494C165; K7ES25; P12955                            | PEPD            |
| AOA499FJK2; P01137                                    | TGFB1           |
| AOA4W8ZXM2                                            | IGHV3-72        |



|                                                                                                          |                                                                            |
|----------------------------------------------------------------------------------------------------------|----------------------------------------------------------------------------|
| A0A590UJJ6; B4DEB1; K7EK07; K7EMV3;<br>K7EP01; K7ES00; P68431; P84243; Q16695;<br>Q5TEC6; Q6NXT2; Q71DI3 | H3-3A;H3-3A;H3-3B;H3-3B;H3-3B;H3-3B;H3C1;H3-3A;HIST3H3;H3-2;H3F3C;HIST2H3A |
| A0A590UK92; O14746; O14746-2; O14746-3;<br>O14746-4                                                      | TERT                                                                       |
| A0A5F9UJX7; A0A5F9UP49; G3V1E2; Q9BRK5;<br>Q9BRK5-3; Q9BRK5-4; Q9BRK5-6                                  | SDF4                                                                       |
| A0A5F9UY30; A0A5H1ZRP2; O43493; O43493-3;<br>O43493-5; O43493-7                                          | TGOLN2                                                                     |
| A0A5F9ZHM4; P07195                                                                                       | LDHB                                                                       |
| A0A5H1ZRQ3                                                                                               | IGKC                                                                       |
| A0A5H1ZRQ7; A0M8Q6                                                                                       | IGLC7                                                                      |
| A1A5D9-2; Q9UJX6-2                                                                                       | BICDL2;ANAPC2                                                              |
| A1L4H1                                                                                                   | SSC5D                                                                      |
| A6NC48; Q10588                                                                                           | BST1                                                                       |
| A6XND0; A6XND1; P17936; P17936-2                                                                         | IGFBP3                                                                     |
| B0QYF7; B0QYF8; F2Z2F1; P02144; Q8WVH6                                                                   | MB                                                                         |
| B0YIW2; P02656                                                                                           | APOC3                                                                      |
| B1ALD9; Q15063; Q15063-3; Q15063-5                                                                       | POSTN                                                                      |
| B1AN99; P35030; P35030-2; P35030-3; P35030-4; P35030-5                                                   | PRSS3                                                                      |

|                                                                                                                                                 |                                                                                             |
|-------------------------------------------------------------------------------------------------------------------------------------------------|---------------------------------------------------------------------------------------------|
| B1AP13; H3BLV0; H7BY55; P08174; P08174-2;<br>P08174-3; P08174-4; P08174-5; P08174-6;<br>P08174-7                                                | CD55                                                                                        |
| B1B0D4; Q86TH1                                                                                                                                  | ADAMTSL2                                                                                    |
| B4DV12; F5GXX7; F5GYU3; F5H265; F5H2Z3;<br>F5H388; F5H6Q2; F5H747; J3QKN0; J3QS39;<br>J3QTR3; P0CG47; P0CG48; P62979; P62987;<br>Q5PY61; Q96C32 | UBB;UBC;UBC;UBC;U<br>BC;UBC;UBC;UBC;UB<br>B;UBB;RPS27A;UBB;<br>UBC;RPS27A;UBA52;<br>UBC;UBC |
| B4E3Q4; Q9NZK5                                                                                                                                  | ADA2                                                                                        |
| B7Z6Z4; F8W1R7; G3V1V0; G8JLA2; J3KND3;<br>P60660; P60660-2                                                                                     | MYL6                                                                                        |
| B7ZKJ8                                                                                                                                          | ITIH4                                                                                       |
| B9A064-2                                                                                                                                        | IGLL5                                                                                       |
| C9IZP8                                                                                                                                          | C1S                                                                                         |
| C9J0J0; Q96EE4                                                                                                                                  | CCDC126                                                                                     |
| C9JF17; P05090                                                                                                                                  | APOD                                                                                        |
| C9JFR7; P99999                                                                                                                                  | CYCS                                                                                        |
| C9JL85; P58546                                                                                                                                  | MTPN                                                                                        |
| C9JZC2                                                                                                                                          | ZNF621                                                                                      |
| D3YTG3; H0Y897; H7C556; Q7Z7G0; Q7Z7G0-2;<br>Q7Z7G0-3; Q7Z7G0-4                                                                                 | ABI3BP                                                                                      |
| D6R934; P02746                                                                                                                                  | C1QB                                                                                        |
| D6RD17; P01591                                                                                                                                  | JCHAIN                                                                                      |
| D6RE82; P56182                                                                                                                                  | RRP1                                                                                        |

|                                                 |                 |
|-------------------------------------------------|-----------------|
| D6RE86                                          | CP              |
| D6RF35; P02774; P02774-3                        | GC              |
| D6RF86; P55285; P55285-2                        | CDH6            |
| D6RIU5; P00995                                  | SPINK1          |
| D6W5L6; P07988                                  | SFTPB           |
| E5RJD0; HOYBY3; P17900                          | GM2A            |
| E7END6; P04070; P04070-2                        | PROC            |
| E7EQB2; E7ER44; P02788; P02788-2                | LTF             |
| E7ESB3; Q13508; Q13508-2; Q13508-3              | ART3            |
| E7ET86; Q8IVW4; Q8IVW4-2                        | CDKL3           |
| E7ETH0                                          | CFI             |
| E7EUF1; Q13822; Q13822-2; Q13822-3              | ENPP2           |
| E7EUJ1; P11150                                  | LIPC            |
| E7EV71; Q14766; Q14766-2; Q14766-4;<br>Q14766-5 | LTBP1           |
| E9PD35; P35916; P35916-1                        | FLT4            |
| E9PEK4; P07333                                  | CSF1R           |
| E9PEP6; O14786                                  | NRP1            |
| E9PK25; HOY4A7; P23528                          | CFL1;BRWD1;CFL1 |
| E9PKY4; Q03167; Q03167-2                        | TGFBR3          |
| E9PND2; E9PP21; E9PS42; P21291                  | CSRP1           |
| E9PRU1; HOYET5; O95967                          | EFEMP2          |
| F5GXJ9; Q13740; Q13740-2                        | ALCAM           |
| F5GY80; F5H7G1                                  | C8B             |

|                                                                                                                                                                                                                             |                         |
|-----------------------------------------------------------------------------------------------------------------------------------------------------------------------------------------------------------------------------|-------------------------|
| F5GZS6; J3KPF3; P08195; P08195-2; P08195-3;<br>P08195-4                                                                                                                                                                     | SLC3A2                  |
| F5GZZ9; Q86VB7; Q86VB7-2; Q86VB7-3                                                                                                                                                                                          | CD163                   |
| F5H2B5                                                                                                                                                                                                                      | PLD4                    |
| F5H8B0; P08709; P08709-2                                                                                                                                                                                                    | F7                      |
| G3V2W1; Q9UK55                                                                                                                                                                                                              | SERPINA10               |
| G3V3A0                                                                                                                                                                                                                      | SERPINA3                |
| G3V4U0; Q9UBX5                                                                                                                                                                                                              | FBLN5                   |
| G3XAI2; P07942                                                                                                                                                                                                              | LAMB1                   |
| G3XAK1; P26927                                                                                                                                                                                                              | MST1                    |
| G5E9Z4                                                                                                                                                                                                                      | PI4K2B                  |
| H0Y2Y8; Q15942; Q15942-2                                                                                                                                                                                                    | ZYX                     |
| H0Y5E4; H0YCV9; H0YD13; H0YDW7; P16070;<br>P16070-10; P16070-11; P16070-12; P16070-13;<br>P16070-14; P16070-15; P16070-16; P16070-17;<br>P16070-18; P16070-3; P16070-4; P16070-5;<br>P16070-6; P16070-7; P16070-8; P16070-9 | CD44                    |
| H0Y755; M9MML0; P08637                                                                                                                                                                                                      | FCGR3A                  |
| H0YAC1; P03952                                                                                                                                                                                                              | KLKB1                   |
| H0YGX7; P52566                                                                                                                                                                                                              | ARHGDIB                 |
| H0YJW9                                                                                                                                                                                                                      |                         |
| H0YLC7; P16930; P16930-2                                                                                                                                                                                                    | FAH                     |
| H3BR24; H3BTD5; MOR1K8                                                                                                                                                                                                      | CCPG1;MYZAP;ARHG<br>EF1 |

|                                                            |                        |
|------------------------------------------------------------|------------------------|
| H7BY64; Q96NZ9                                             | ZNF511-<br>PRAP1;PRAP1 |
| H7C1K7                                                     | KIF15                  |
| H7C5R1                                                     | CP                     |
| H9KV31; O15394                                             | NCAM2                  |
| H9N1E7; P07359                                             | FLT1;GP1BA             |
| I3L145; P04278                                             | SHBG                   |
| I3L397; I3L504; P63241; P63241-2                           | EIF5A                  |
| J3KNB4; P49913                                             | CAMP                   |
| J3KNV4; Q13683; Q13683-10; Q13683-3;<br>Q13683-7; Q13683-9 | ITGA7                  |
| J3KPA1; P54108; P54108-2; P54108-3                         | CRISP3                 |
| J3QQR8; J3QQX6; J3QRQ1; J3QRT5; P13598                     | ICAM2                  |
| K4DIA0; O75144; O75144-2                                   | ICOSLG                 |
| K7ELL7; P14314; P14314-2                                   | PRKCSH                 |
| K7ER74; P02655                                             | APOC4-<br>APOC2;APOC2  |
| K7ERG9; P00746                                             | CFD                    |
| K7ERI9; P02654                                             | APOC1                  |
| M0QY68; Q9BTV5                                             | FSD1                   |
| M0QZ43; P23327                                             | HRC                    |
| M0R1Q1                                                     | C3                     |
| M0R3C9; Q9UM47                                             | NOTCH3                 |
| O00151                                                     | PDLIM1                 |
| O00187                                                     | MASP2                  |

|                  |           |
|------------------|-----------|
| 000391           | QSOX1     |
| 000533           | CHL1      |
| 000592; 000592-2 | PODXL     |
| 000602           | FCN1      |
| 014498           | ISLR      |
| 014645-2         | DNALI1    |
| 014791; 014791-2 | APOL1     |
| 015204; 015204-2 | ADAMDEC1  |
| 043157           | PLXNB1    |
| 043852; 043852-3 | CALU      |
| 043866           | CD5L      |
| 060235           | TMPRSS11D |
| 075083           | WDR1      |
| 075368           | SH3BGRL   |
| 075594           | PGLYRP1   |
| 075636           | FCN3      |
| 075882-2         | ATRN      |
| 076061           | STC2      |
| 094985-2         | CLSTN1    |
| 095445           | APOM      |
| 095479; R4GMU1   | H6PD      |
| 095497           | VNN1      |
| 095810           | CAVIN2    |
| 095980           | RECK      |
| P00338; P00338-3 | LDHA      |

|                            |          |
|----------------------------|----------|
| P00450                     | CP       |
| P00488                     | F13A1    |
| P00491                     | PNP      |
| P00533; P00533-3; P00533-4 | EGFR     |
| P00558; P00558-2           | PGK1     |
| P00734                     | F2       |
| P00738                     | HP       |
| P00739                     | HPR      |
| P00740                     | F9       |
| P00742                     | F10      |
| P00747                     | PLG      |
| P00748                     | F12      |
| P00915                     | CA1      |
| P00918                     | CA2      |
| P01008                     | SERPINC1 |
| P01009                     | SERPINA1 |
| P01011                     | SERPINA3 |
| P01019                     | AGT      |
| P01023                     | A2M      |
| P01024                     | C3       |
| P01031                     | C5       |
| P01033; Q5H9A7             | TIMP1    |
| P01034                     | CST3     |
| P01042                     | KNG1     |
| P01042-2                   | KNG1     |

|                  |          |
|------------------|----------|
| P01344-3         | IGF2     |
| P01624           | IGKV3-15 |
| P01700           | IGLV1-47 |
| P01714           | IGLV3-19 |
| P01766           | IGHV3-13 |
| P01780           | IGHV3-7  |
| P01833           | PIGR     |
| P01834           | IGKC     |
| P01871           | IGHM     |
| P01876           | IGHA1    |
| P02452           | COL1A1   |
| P02461; P02461-2 | COL3A1   |
| P02647           | APOA1    |
| P02649           | APOE     |
| P02652; V9GYM3   | APOA2    |
| P02671           | FGA      |
| P02675           | FGB      |
| P02679; P02679-2 | FGG      |
| P02730; P02730-2 | SLC4A1   |
| P02741           | CRP      |
| P02743           | APCS     |
| P02745           | C1QA     |
| P02747           | C1QC     |
| P02748           | C9       |
| P02749           | APOH     |



|                    |       |
|--------------------|-------|
| P02750             | LRG1  |
| P02751-1; P02751-3 | FN1   |
| P02751-10          | FN1   |
| P02753; Q5VY30     | RBP4  |
| P02760             | AMBP  |
| P02763             | ORM1  |
| P02765             | AHSG  |
| P02766             | TTR   |
| P02768             | ALB   |
| P02774-2           | GC    |
| P02775             | PPBP  |
| P02776             | PF4   |
| P02787             | TF    |
| P02790             | HPX   |
| P03950             | ANG   |
| P03951             | F11   |
| P04003             | C4BPA |
| P04004             | VTN   |
| P04066             | FUCA1 |
| P04075             | ALDOA |
| P04114             | APOB  |
| P04180             | LCAT  |
| P04196             | HRG   |
| P04217             | A1BG  |
| P04275             | VWF   |

|                                                    |          |
|----------------------------------------------------|----------|
| P04279; P04279-2                                   | SEMG1    |
| P04406                                             | GAPDH    |
| P04745                                             | AMY1A    |
| P05019; P05019-2; P05019-3; P05019-4               | IGF1     |
| P05067; P05067-11; P05067-7; P05067-8;<br>P05067-9 | APP      |
| P05106                                             | ITGB3    |
| P05109                                             | S100A8   |
| P05121; P05121-2                                   | SERPINE1 |
| P05154                                             | SERPINA5 |
| P05155; P05155-3                                   | SERPING1 |
| P05160                                             | F13B     |
| P05164; P05164-2; P05164-3                         | MPO      |
| P05362                                             | ICAM1    |
| P05451                                             | REG1A    |
| P05452                                             | CLEC3B   |
| P05543                                             | SERPINA7 |
| P05546                                             | SERPIND1 |
| P05556                                             | ITGB1    |
| P06276                                             | BCHE     |
| P06312                                             | IGKV4-1  |
| P06331                                             | IGHV4-34 |
| P06396                                             | GSN      |
| P06396-2                                           | GSN      |
| P06681                                             | C2       |

|                                    |                                                |
|------------------------------------|------------------------------------------------|
| P06702                             | S100A9                                         |
| P06703; R4GN98                     | S100A6                                         |
| P06727                             | APOA4                                          |
| P06732                             | CKM                                            |
| P06899; P23527; P33778; Q16778     | H2BC11; HIST1H2BO;<br>HIST1H2BB; HIST2H2<br>BE |
| P07237                             | P4HB                                           |
| P07307; P07307-2; P07307-3         | ASGR2                                          |
| P07357                             | C8A                                            |
| P07358                             | C8B                                            |
| P07360                             | C8G                                            |
| P07384                             | CAPN1                                          |
| P07437; Q5JP53                     | TUBB                                           |
| P07451                             | CA3                                            |
| P07737                             | PFN1                                           |
| P07858                             | CTSB                                           |
| P07911; P07911-4; P07911-5; X6RBG4 | UMOD                                           |
| P07996                             | THBS1                                          |
| P07998                             | RNASE1                                         |
| P08185                             | SERPINA6                                       |
| P08253                             | MMP2                                           |
| P08254                             | MMP3                                           |
| P08294                             | SOD3                                           |
| P08311                             | CTSG                                           |

|                                      |             |
|--------------------------------------|-------------|
| P08493; P08493-2                     | MGP         |
| P08514; P08514-2; P08514-3           | ITGA2B      |
| P08519                               | LPA         |
| P08567                               | PLEK        |
| P08571                               | CD14        |
| P08581; P08581-2                     | MET         |
| P08603                               | CFH         |
| P08697                               | SERPINF2    |
| P09172                               | DBH         |
| P09382                               | LGALS1      |
| P09486                               | SPARC       |
| P09619                               | PDGFRB      |
| P09871                               | C1S         |
| POCOL4                               | C4A         |
| POCOL5                               | C4B         |
| PODJI8                               | SAA1        |
| PODJI9                               | SAA2        |
| PODOY2; PODOY3                       | IGLC2;IGLC3 |
| P10124                               | SRGN        |
| P10451; P10451-2; P10451-3; P10451-4 | SPP1        |
| P10586; P10586-2                     | PTPRF       |
| P10599                               | TXN         |
| P10643                               | C7          |
| P10645                               | CHGA        |
| P10646                               | TFPI        |

|                                                   |        |
|---------------------------------------------------|--------|
| P10720                                            | PF4V1  |
| P10721; P10721-2                                  | KIT    |
| P10909; P10909-2; P10909-4; P10909-5;<br>P10909-6 | CLU    |
| P11021                                            | HSPA5  |
| P11047                                            | LAMC1  |
| P11142                                            | HSPA8  |
| P11226                                            | MBL2   |
| P11279                                            | LAMP1  |
| P11597                                            | CETP   |
| P11717                                            | IGF2R  |
| P12111                                            | COL6A3 |
| P12318; P12318-2                                  | FCGR2A |
| P12724                                            | RNASE3 |
| P12814                                            | ACTN1  |
| P12830                                            | CDH1   |
| P13473; P13473-2; P13473-3                        | LAMP2  |
| P13497                                            | BMP1   |
| P13671                                            | C6     |
| P13727                                            | PRG2   |
| P13796                                            | LCP1   |
| P14151; P14151-2                                  | SELL   |
| P14209                                            | CD99   |
| P14543                                            | NID1   |
| P14618-2                                          | PKM    |

|                                                             |         |
|-------------------------------------------------------------|---------|
| P14625                                                      | HSP90B1 |
| P14780                                                      | MMP9    |
| P15144                                                      | ANPEP   |
| P15169                                                      | CPN1    |
| P16035                                                      | TIMP2   |
| P16109; Q5R349                                              | SELP    |
| P16284; P16284-2; P16284-3; P16284-4;<br>P16284-5; P16284-6 | PECAM1  |
| P17301                                                      | ITGA2   |
| P17813; P17813-2                                            | ENG     |
| P17931                                                      | LGALS3  |
| P18065                                                      | IGFBP2  |
| P18206; P18206-2                                            | VCL     |
| P18428                                                      | LBP     |
| P18615-4                                                    | NELFE   |
| P19021; P19021-2; P19021-3; P19021-4;<br>P19021-5; P19021-6 | PAM     |
| P19022; P19022-2                                            | CDH2    |
| P19320                                                      | VCAM1   |
| P19652                                                      | ORM2    |
| P19823                                                      | ITIH2   |
| P19827                                                      | ITIH1   |
| P19827-2                                                    | ITIH1   |
| P20023; P20023-2; P20023-3; P20023-4                        | CR2     |
| P20742                                                      | PZP     |

|                            |        |
|----------------------------|--------|
| P20851; P20851-2           | C4BPB  |
| P21333; P21333-2           | FLNA   |
| P21709                     | EPHA1  |
| P22692                     | IGFBP4 |
| P22792                     | CPN2   |
| P22891; P22891-2           | PROZ   |
| P22897                     | MRC1   |
| P23141; P23141-2; P23141-3 | CES1   |
| P23142                     | FBLN1  |
| P23142-4                   | FBLN1  |
| P23284                     | PIIB   |
| P23470; P23470-2           | PTPRG  |
| P24592                     | IGFBP6 |
| P24593                     | IGFBP5 |
| P24821                     | TNC    |
| P25311                     | AZGP1  |
| P25786; P25786-2           | PSMA1  |
| P25815                     | S100P  |
| P26038                     | MSN    |
| P26992                     | CNTFR  |
| P27105                     | STOM   |
| P27169                     | PON1   |
| P27348                     | YWHAQ  |
| P27487                     | DPP4   |
| P27797                     | CALR   |

|                            |          |
|----------------------------|----------|
| P27918                     | CFP      |
| P28799; P28799-3           | GRN      |
| P29279                     | CCN2     |
| P29622                     | SERPINA4 |
| P30101                     | PDIA3    |
| P30530; P30530-2           | AXL      |
| P31146                     | CORO1A   |
| P31151                     | S100A7   |
| P31260-2                   | HOXA10   |
| P32004; P32004-2; P32004-3 | L1CAM    |
| P32119                     | PRDX2    |
| P32942                     | ICAM3    |
| P33151                     | CDH5     |
| P34096                     | RNASE4   |
| P35247                     | SFTPD    |
| P35443                     | THBS4    |
| P35555                     | FBN1     |
| P35579                     | MYH9     |
| P35590                     | TIE1     |
| P35858; P35858-2           | IGFALS   |
| P36222                     | CHI3L1   |
| P36955                     | SERPINF1 |
| P39060; P39060-1; P39060-2 | COL18A1  |
| P40197                     | GP5      |
| P41222                     | PTGDS    |



|                                      |             |
|--------------------------------------|-------------|
| P42785; P42785-2                     | PRCP        |
| P43121                               | MCAM        |
| P43251; P43251-2; P43251-3; P43251-4 | BTD         |
| P43652                               | AFM         |
| P46531                               | NOTCH1      |
| P48723                               | HSPA13      |
| P48740                               | MASP1       |
| P48740-2                             | MASP1       |
| P49747                               | COMP        |
| P49908                               | SELENOP     |
| P51884                               | LUM         |
| P54289; P54289-2; P54289-5           | CACNA2D1    |
| P55056                               | APOC4       |
| P55058                               | PLTP        |
| P55103                               | INHBC       |
| P55268                               | LAMB2       |
| P55290; P55290-4                     | CDH13       |
| P55774                               | CCL18       |
| P58335; P58335-2; P58335-3; P58335-4 | ANTXR2      |
| P59665; P59666                       | DEFA1;DEFA3 |
| P61158                               | ACTR3       |
| P61224; P61224-3                     | RAP1B       |
| P61626                               | LYZ         |
| P61769                               | B2M         |
| P61981                               | YWHAG       |

|                            |          |
|----------------------------|----------|
| P62328                     | TMSB4X   |
| P62937                     | PPIA     |
| P63104                     | YWHAZ    |
| P67936                     | TPM4     |
| P68366; P68366-2           | TUBA4A   |
| P68871                     | HBB      |
| P69905                     | HBA1     |
| P80108                     | GPLD1    |
| P80188; X6R8F3             | LCN2     |
| P80723; P80723-2           | BASP1    |
| P80748                     | IGLV3-21 |
| P81605; P81605-2           | DCD      |
| P98160                     | HSPG2    |
| Q01459                     | CTBS     |
| Q01518; Q01518-2           | CAP1     |
| Q02985                     | CFHR3    |
| Q03591                     | CFHR1    |
| Q04756                     | HGFAC    |
| Q04917                     | YWHAH    |
| Q06033; Q06033-2           | ITIH3    |
| Q06413-6                   | MEF2C    |
| Q07954                     | LRP1     |
| Q08380                     | LGALS3BP |
| Q10001                     |          |
| Q12794; Q12794-2; Q12794-3 | HYAL1    |

|                                                   |             |
|---------------------------------------------------|-------------|
| Q12805; Q12805-2; Q12805-3; Q12805-4              | EFEMP1      |
| Q12805-5                                          | EFEMP1      |
| Q12841                                            | FSTL1       |
| Q12860                                            | CNTN1       |
| Q13093                                            | PLA2G7      |
| Q13103                                            | SPP2        |
| Q13201                                            | MMRN1       |
| Q13332; Q13332-2; Q13332-3; Q13332-4;<br>Q13332-6 | PTPRS       |
| Q13790                                            | APOF        |
| Q14112; Q14112-2                                  | NID2        |
| Q14116-2                                          | IL18        |
| Q14118                                            | DAG1        |
| Q14126                                            | DSG2        |
| Q14515                                            | SPARCL1     |
| Q14520; Q14520-2                                  | HABP2       |
| Q14624                                            | ITIH4       |
| Q14624-2                                          | ITIH4       |
| Q15067-3; Q3I5F7                                  | ACOX1;ACOT6 |
| Q15113                                            | PCOLCE      |
| Q15166                                            | PON3        |
| Q15293; Q15293-2                                  | RCN1        |
| Q15404; Q15404-2                                  | RSU1        |
| Q15485                                            | FCN2        |
| Q15582                                            | TGFBI       |

|                                         |          |
|-----------------------------------------|----------|
| Q15848                                  | ADIPOQ   |
| Q16270; Q16270-2                        | IGFBP7   |
| Q16610                                  | ECM1     |
| Q16627                                  | CCL14    |
| Q16706                                  | MAN2A1   |
| Q16853                                  | AOC3     |
| Q5MJ68                                  | SPDYC    |
| Q5SZC9; Q9P1F3                          | ABRACL   |
| Q5T123; Q9H299                          | SH3BGR13 |
| Q5TFM2                                  | CFH      |
| Q5VY43                                  | PEAR1    |
| Q68G74-2                                | LHX8     |
| Q6E0U4-16; Q6E0U4-2; Q6E0U4-5; Q6E0U4-6 | DMKN     |
| Q6EMK4                                  | VASN     |
| Q6GTS8                                  | PM20D1   |
| Q6UWP8                                  | SBSN     |
| Q6UWP8-2                                | SBSN     |
| Q6UX71                                  | PLXDC2   |
| Q6UXB8                                  | PI16     |
| Q6UY14; Q6UY14-2; Q6UY14-3              | ADAMTSL4 |
| Q6YHK3                                  | CD109    |
| Q71F56                                  | MED13L   |
| Q71U36; Q71U36-2                        | TUBA1A   |
| Q76LX8                                  | ADAMTS13 |
| Q7Z7M0                                  | MEGF8    |

|                                      |           |
|--------------------------------------|-----------|
| Q86U17                               | SERPINA11 |
| Q86UD1                               | OAF       |
| Q86UX7; Q86UX7-2                     | FERMT3    |
| Q86VX2-2                             | COMMD7    |
| Q86YW5; Q86YW5-2                     | TREML1    |
| Q86YZ3                               | HRNR      |
| Q8IWW2                               | CNTN4     |
| Q8IXL6                               | FAM20C    |
| Q8IYA8-3                             | CCDC36    |
| Q8IZF2; Q8IZF2-2                     | ADGRF5    |
| Q8NBP7                               | PCSK9     |
| Q8NDA2; Q8NDA2-2; Q8NDA2-4           | HMCN2     |
| Q8TDL5                               | BPIFB1    |
| Q8WWZ8                               | OIT3      |
| Q8WZ75; Q8WZ75-2                     | ROBO4     |
| Q92496; Q92496-2                     | CFHR4     |
| Q92520                               | FAM3C     |
| Q92743                               | HTRA1     |
| Q92820                               | GGH       |
| Q92859; Q92859-2; Q92859-3; Q92859-4 | NEO1      |
| Q92954-3                             | PRG4      |
| Q93063; Q93063-2; Q93063-3           | EXT2      |
| Q96IY4                               | CPB2      |
| Q96KN2                               | CNDP1     |
| Q96PD5                               | PGLYRP2   |

|                                                                                                         |           |
|---------------------------------------------------------------------------------------------------------|-----------|
| Q99453                                                                                                  | PHOX2B    |
| Q99650; Q99650-2                                                                                        | OSMR      |
| Q99784; Q99784-3; Q99784-5                                                                              | OLFM1     |
| Q99969                                                                                                  | RARRES2   |
| Q99972                                                                                                  | MYOC      |
| Q9BQ51                                                                                                  | PDCD1LG2  |
| Q9BTY2                                                                                                  | FUCA2     |
| Q9BUN1                                                                                                  | MENT      |
| Q9BWP8; Q9BWP8-10; Q9BWP8-2; Q9BWP8-3;<br>Q9BWP8-4; Q9BWP8-5; Q9BWP8-6; Q9BWP8-7;<br>Q9BWP8-8; Q9BWP8-9 | COLEC11   |
| Q9BXR6                                                                                                  | CFHR5     |
| Q9BYJ0                                                                                                  | FGFBP2    |
| Q9H089; Q9H4S2                                                                                          | LSG1;GSX1 |
| Q9H1U4                                                                                                  | MEGF9     |
| Q9H4A9                                                                                                  | DPEP2     |
| Q9H4B7                                                                                                  | TUBB1     |
| Q9H4G4                                                                                                  | GLIPR2    |
| Q9H6X2; Q9H6X2-2; Q9H6X2-4; Q9H6X2-5;<br>Q9H6X2-6                                                       | ANTXR1    |
| Q9H8L6                                                                                                  | MMRN2     |
| Q9HBR0                                                                                                  | SLC38A10  |
| Q9HCB6                                                                                                  | SPON1     |
| Q9HDC9                                                                                                  | APMAP     |
| Q9NPG4                                                                                                  | PCDH12    |

|                                                             |          |
|-------------------------------------------------------------|----------|
| Q9NPH3; Q9NPH3-2; Q9NPH3-5                                  | IL1RAP   |
| Q9NPR2; Q9NPR2-2                                            | SEMA4B   |
| Q9NPY3                                                      | CD93     |
| Q9NQM4                                                      | PIH1D3   |
| Q9NY15                                                      | STAB1    |
| Q9NZ08; Q9NZ08-2                                            | ERAP1    |
| Q9NZP8                                                      | C1RL     |
| Q9NZT1                                                      | CALML5   |
| Q9P232                                                      | CNTN3    |
| Q9UBG0                                                      | MRC2     |
| Q9UBR2                                                      | CTSZ     |
| Q9UBX1                                                      | CTSF     |
| Q9UEW3; Q9UEW3-2                                            | MARCO    |
| Q9UGM5                                                      | FETUB    |
| Q9UHG3                                                      | PCYOX1   |
| Q9UIB8; Q9UIB8-2; Q9UIB8-3; Q9UIB8-4;<br>Q9UIB8-5; Q9UIB8-6 | CD84     |
| Q9UJC5                                                      | SH3BGRL2 |
| Q9UJJ9                                                      | GNPTG    |
| Q9UKD1                                                      | GMEB2    |
| Q9UKX2                                                      | MYH2     |
| Q9ULI3                                                      | HEG1     |
| Q9UNW1                                                      | MINPP1   |
| Q9Y251; Q9Y251-2                                            | HPSE     |
| Q9Y490                                                      | TLN1     |

|        |         |
|--------|---------|
| Q9Y5C1 | ANGPTL3 |
| Q9Y5Y7 | LYVE1   |
| Q9Y646 | CPQ     |
| Q9Y6R7 | FCGBP   |
| Q9Y6Z7 | COLEC10 |
